# Supplementary material
Source: PubMed Central journal article supplement (PMC5662110)
Supplement: NIHMS872503-supplement-10904_2017_561_MOESM1_ESM.pdf [file NIHMS872503-supplement-10904_2017_561_MOESM1_ESM.pdf]

# Binding of Cobaltocenium-containing Polyelectrolytes with Anionic Probes

Parasmani Pageni, Mohammad Pabel Kabir, Peng Yang and Chuanbing Tang\*

Department of Chemistry and Biochemistry, University of South Carolina, Columbia, South Carolina 29208, United States

E-mail: [tang4@mailbox.sc.edu](mailto:tang4@mailbox.sc.edu).

## Supporting Information

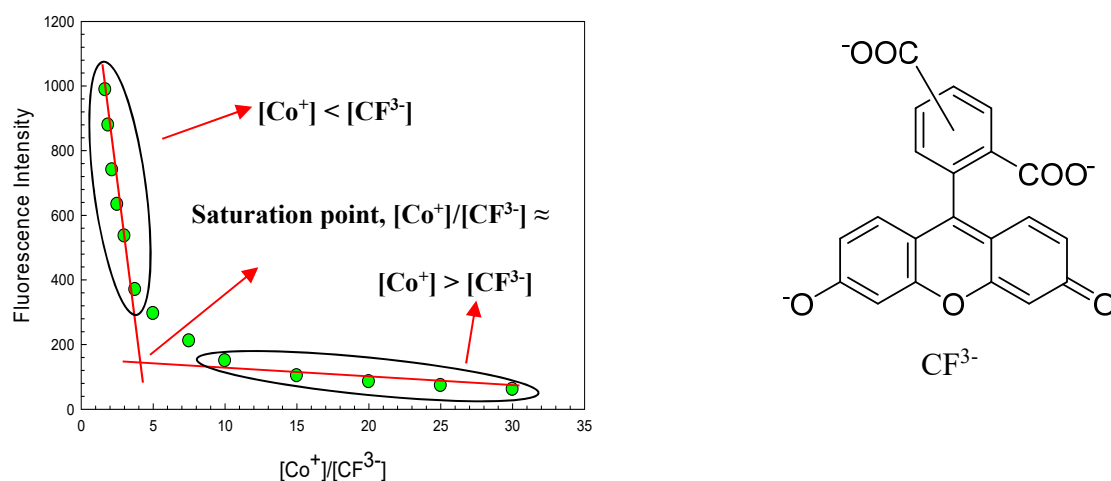

**Figure S1:** (Left): isotherm describing the binding of 5(6)-carboxyfluorescein (CF) to cobaltocenium containing polymer, monitored through fluorescence intensity in a buffered water solution (pH 7.4).  $[CF^{3-}] = 1.0 \times 10^{-6}$  M; (Right): structure and protonation states of CF when dissolved in a buffered aqueous solution at pH 7.4.

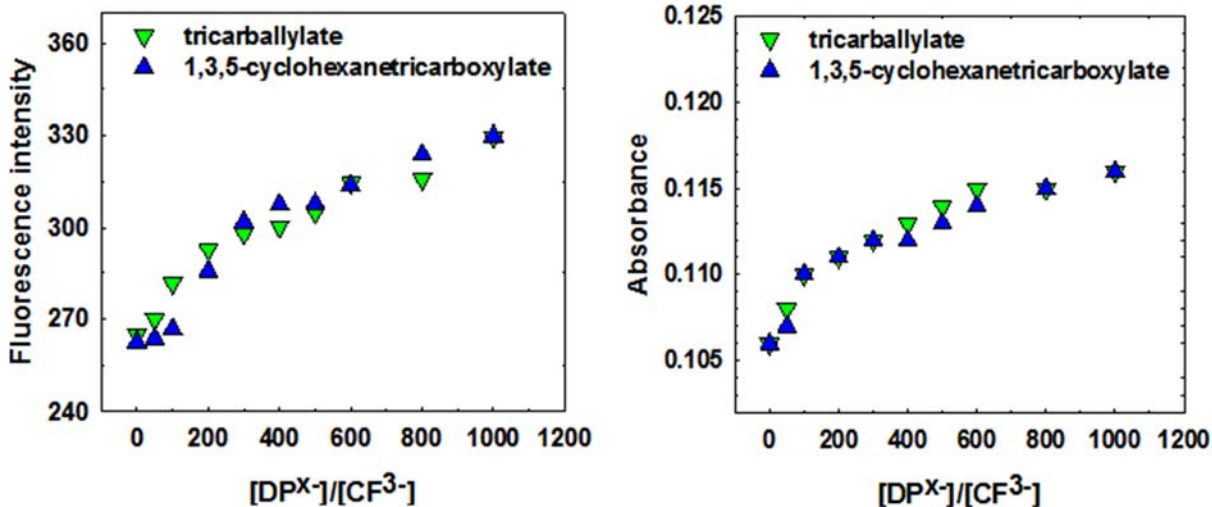

**Figure S2.** Fluorescence and absorbance isotherms from titration of a P-CFn complex with trianionic displacers with different shape.  $[CF] = 1.0 \times 10^{-6}$  M,  $[Co^+] = 4.0 \times 10^{-6}$  M in buffered solution (50 mM Tris at pH 7.4),  $\lambda_{exc} = 494$ nm.

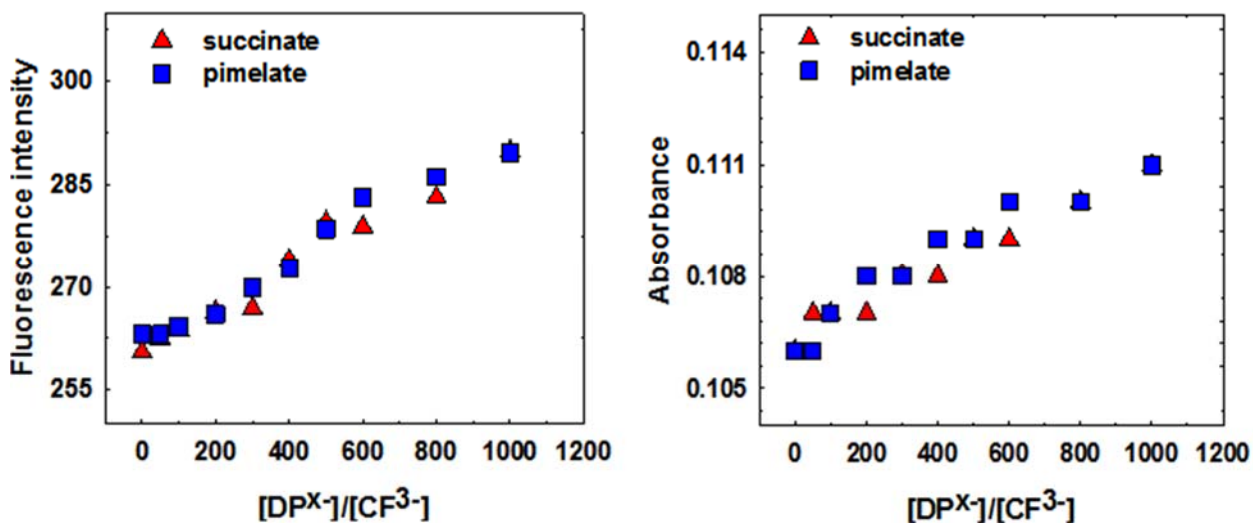

**Figure S3.** Fluorescence and absorbance isotherms from titration of a P-CFn complex with different size of displacers.  $[CF] = 1.0 \times 10^{-6}$  M,  $[Co^+] = 4.0 \times 10^{-6}$  M in buffered solution (50 mM Tris at pH 7.4),  $\lambda_{exc} = 494$ nm.

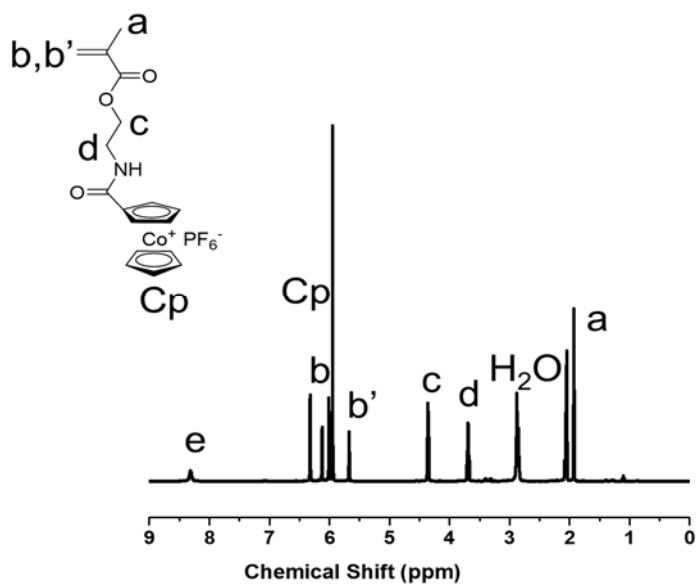

**Figure S4.**  $^1\text{H}$  NMR spectrum of cobaltocenium monomer  $\text{CoAEMAPF}_6$  in  $\text{CD}_3\text{COCD}_3$ .

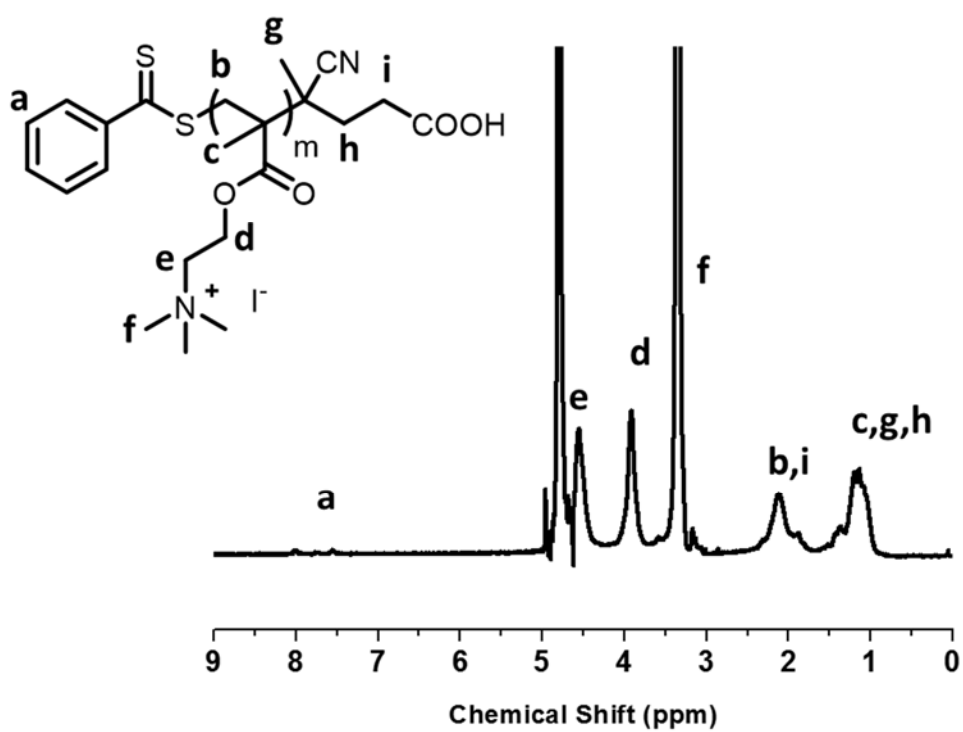

**Figure S5.**  $^1\text{H}$  NMR spectrum of poly((2-dimethylamino)ethyl methacrylate).

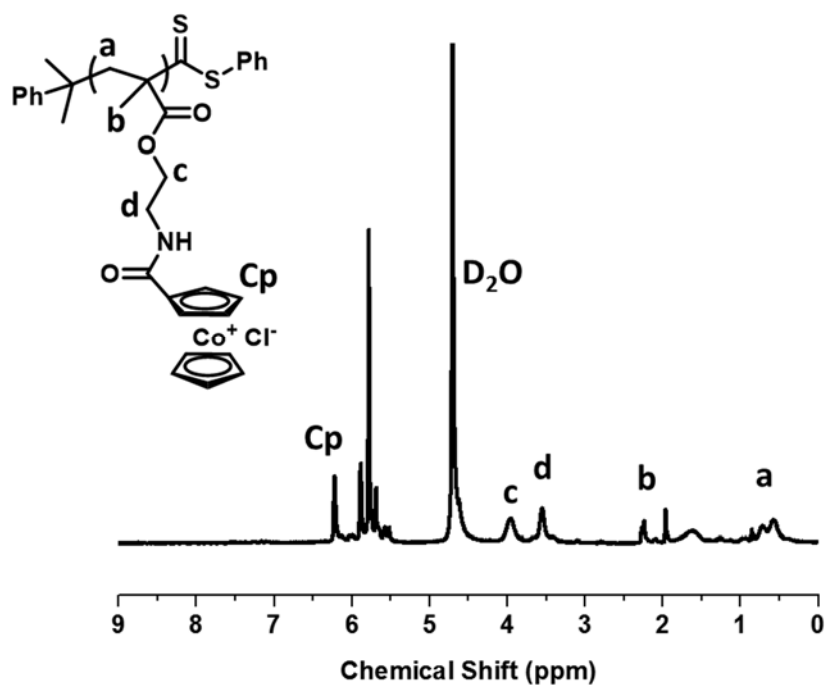

**Figure S6.**  $^1\text{H}$  NMR spectrum of poly(cobaltocenium methacrylate).

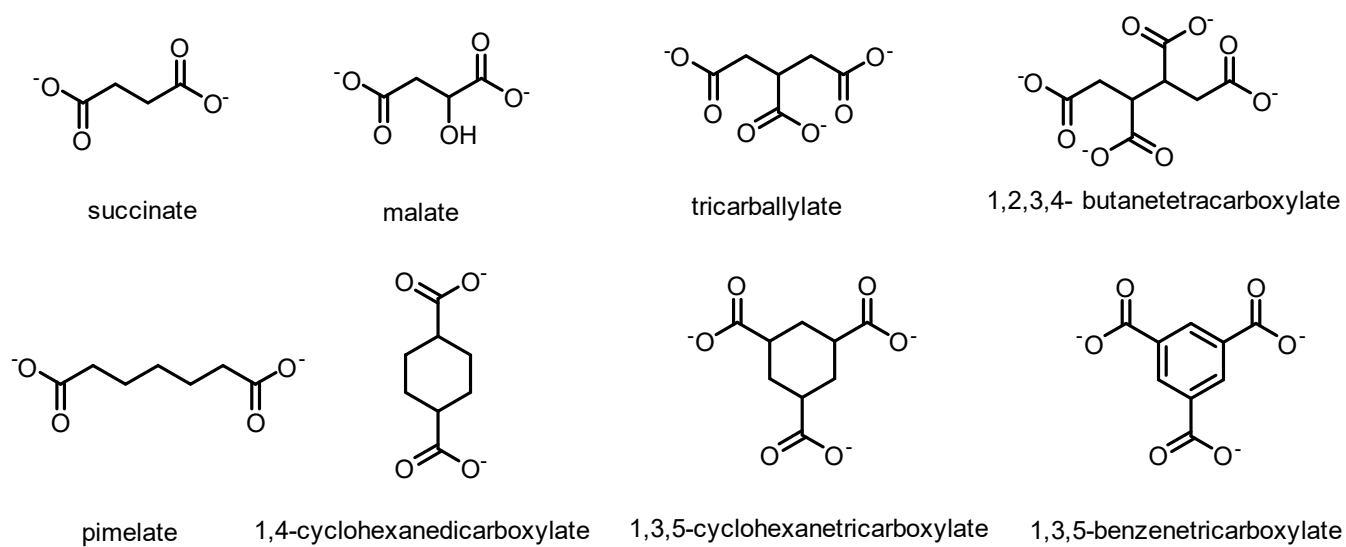

**Figure S7.** Model carboxylates used as anionic probes.

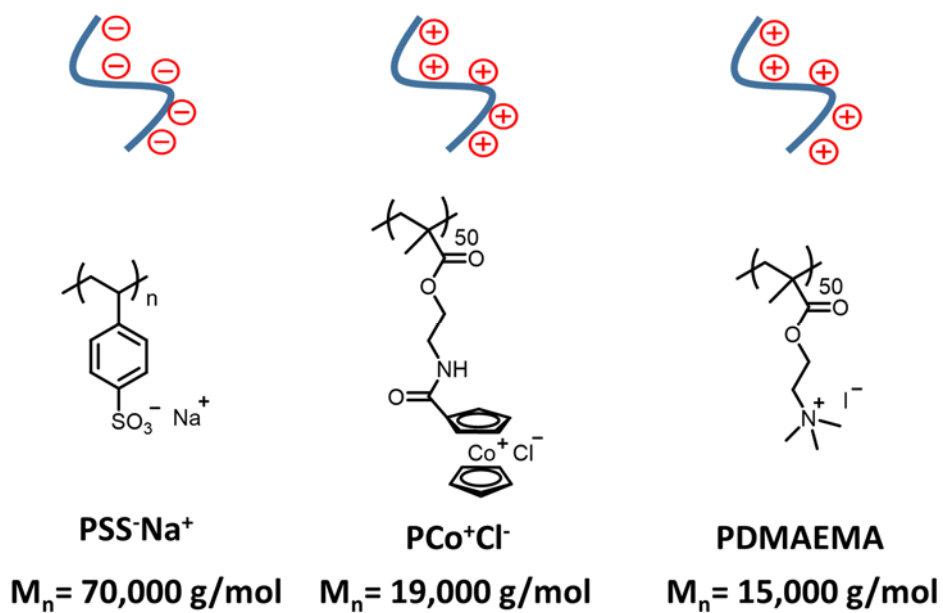

**Figure S8.** Polyelectrolytes used for this experiment.

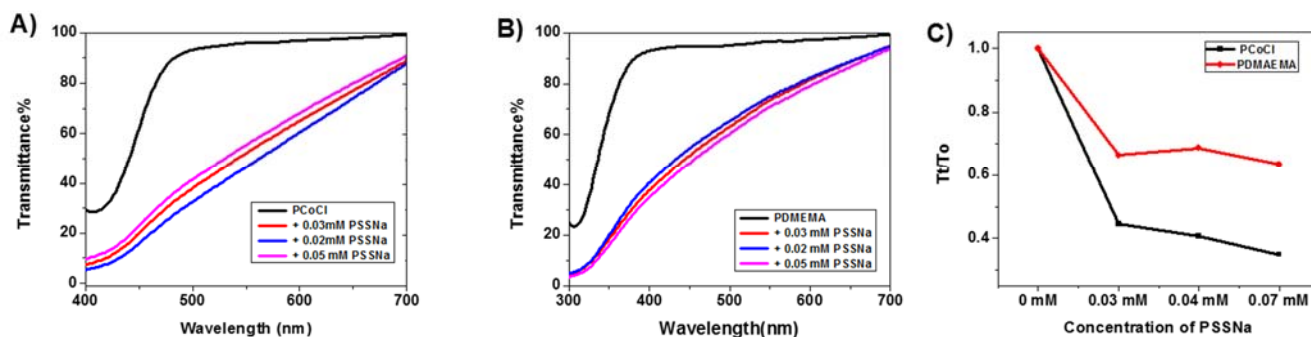

**Figure S9.** The transmittance of various polyelectrolyte solutions: A) 1.0 mL 0.10 mM PCoCl solution with different concentration of 1.0 mL PSSNa; B) 1.0 mL 0.10 mM PDMAEMA solution with various concentrations of 1.0 mL PSSNa; C) Transmittance ratio ( $T_t/T_o$ ) as a function of concentrations of PSSNa.
